# Supplementary material
Source: Springer Nature journal article supplement (https://www.springermedizin.de/resource/supplementary/12877_2012_849_MOESM3_ESM.pdf/9440528)
Supplement: MOESM3 [file 9440528]

**Initial Cohort**  
Those  $\geq 65$  years with a fracture between April 1, 1991 and March 31, 2002 ( $n = 81,870$ ) and a random sample ( $n = 142,077$ ) of non-fracture subjects registered in the BCLHD over the same time period ( $n = 223,947$ )

**Bisphosphonate “Exposure” Cohort**  
Those  $\geq 65$  years of age newly dispensed an oral bisphosphonate during the study index period – excluded those who were dispensed the drug within the previous 365 days ( $n = 26,518$ )

Identify **nested cases** within the bisphosphonate cohort – those with a **diagnosis of UGIB and UGIB related death** within 120 days of drug index date ( $n = 412$ )

**Exclude** – patients with previous diagnosis of UGIB within 365 days prior to index date of drug ( $n = 295$ )

**Outcome “case” group:**  
UGIB or UGIB related death  
( $n = 117$ )

**Internal control group:**  
No UGIB or UGIB related death  
( $n = 26,106$ )
